# Supplementary material for: Design of Perovskite-Type Fluorides Cathodes for Na-ion Batteries: Correlation between Structure and Transport
Source: MDPI journal article supplement (doi:10.3390/batteries8090126), 2022-09-13
Supplement: s1 [file s1]

## Electronic Supplementary Information

### Design of perovskite-type fluorides cathodes for Na-ion batteries: correlation between structure and transport

*Michele Montalbano, Daniele Callegari, Umberto Anselmi Tamburini, Cristina Tealdi*

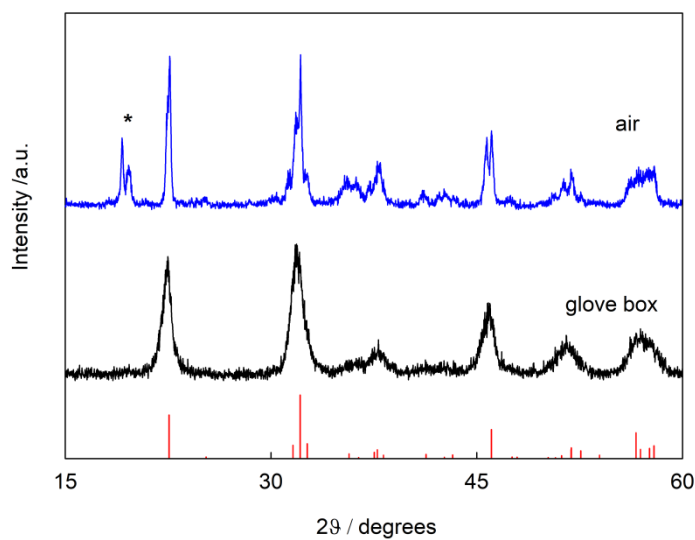

**Figure S1** XRPD patterns of the NaFeF<sub>3</sub> composition (ICDD: 43-0705) prepared in air (upper part) and in Ar-filled glove box (lower part), showing the formation of impurities for the synthesis conducted in air (marked with an asterisk is the main diffraction peak of the Na<sub>3</sub>FeF<sub>6</sub> phase).

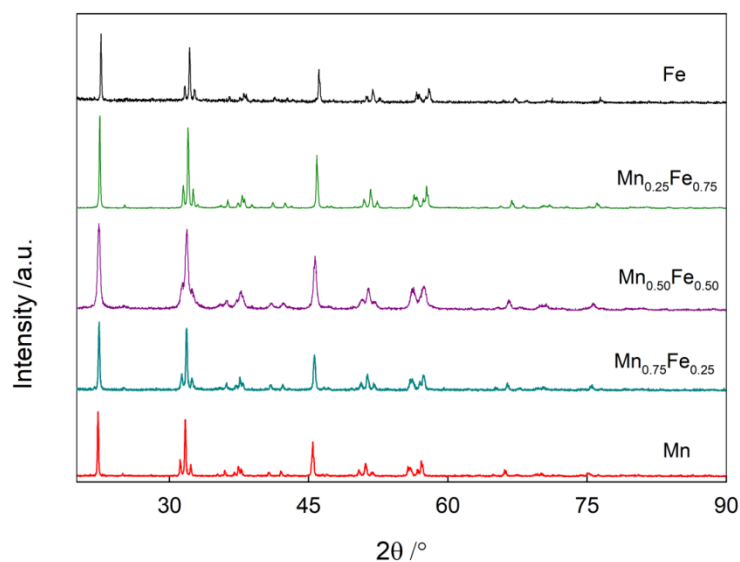

**Figure S2** XRPD patterns of the NaMn<sub>1-x</sub>Fe<sub>x</sub>F<sub>3</sub> series prepared without sodium citrate, showing the formation of a solid solution over the entire compositional range.

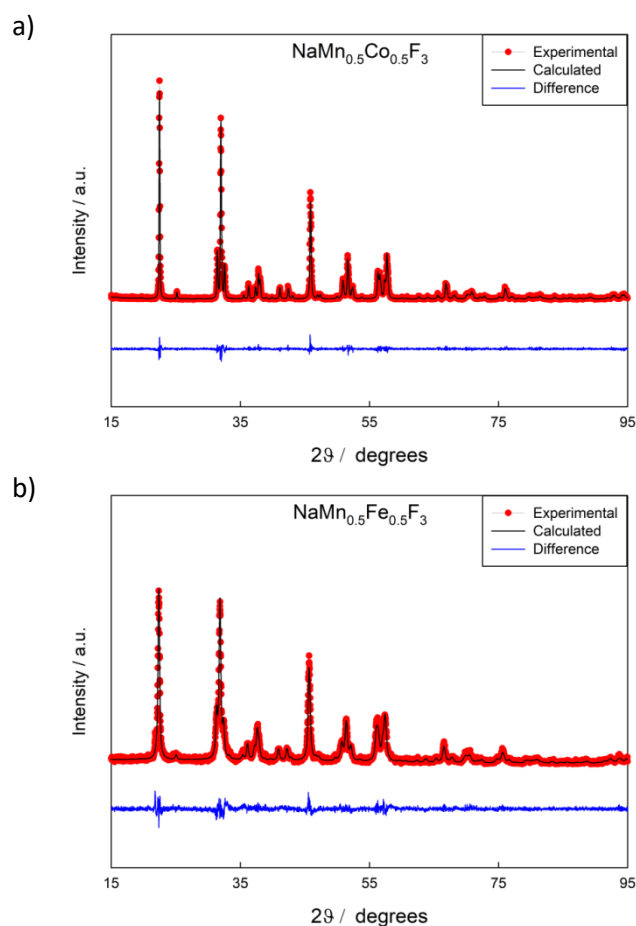

**Figure S3** Rietveld refined XRPD patterns of the NaMn<sub>0.5</sub>Fe<sub>0.5</sub>F<sub>3</sub> and the NaMn<sub>0.5</sub>Co<sub>0.5</sub>F<sub>3</sub> compounds prepared without sodium citrate, showing the good agreement between experimental and calculated profiles ( $\chi^2 = 1.20$ ;  $\chi^2 = 1.43$ ).

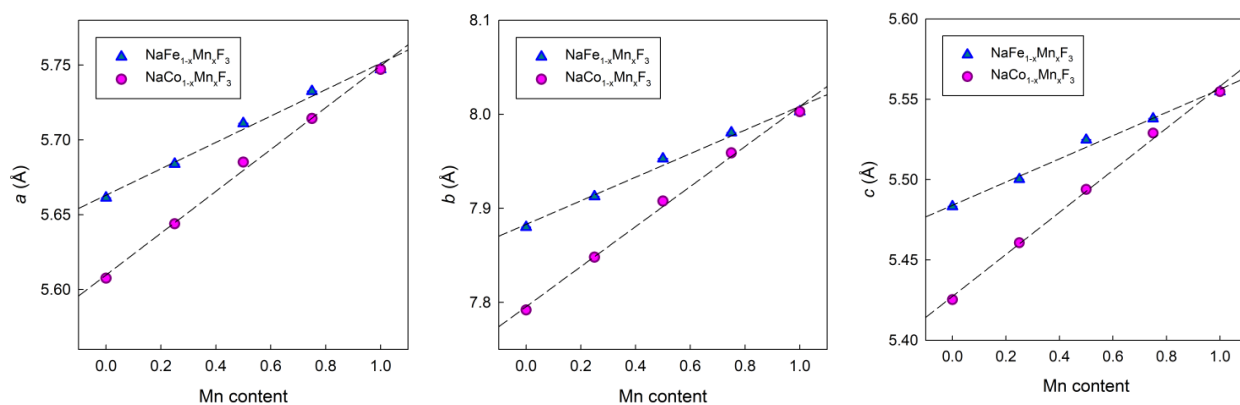

**Figure S4** Lattice parameters vs composition trend for the two series, *i.e.* NaFe<sub>1-x</sub>Mn<sub>x</sub>F<sub>3</sub> and NaCo<sub>1-x</sub>Mn<sub>x</sub>F<sub>3</sub>. Lines are linearly fit to the data and error bars are within the size of the symbol.

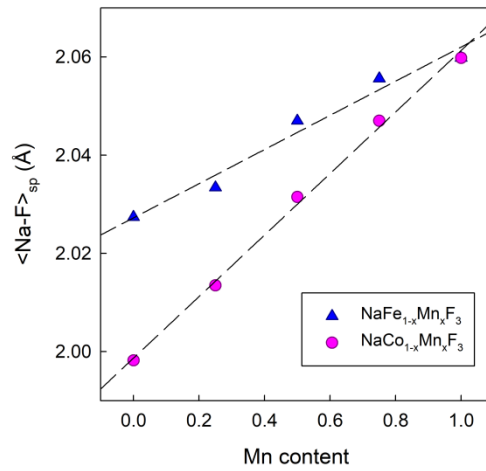

**Figure S5** Average Na-F distance at the saddle point configuration as a function of the Mn content for the two series, *i.e.*  $\text{NaFe}_{1-x}\text{Mn}_x\text{F}_3$  and  $\text{NaCo}_{1-x}\text{Mn}_x\text{F}_3$ . Lines are linearly fit to the data and error bars are within the size of the symbol.

**Table S1** – Rietveld refined structural parameters of  $\text{NaCoF}_3$ ,  $\text{NaFeF}_3$  and  $\text{NaMnF}_3$ .

| Structural parameter | $\text{NaCoF}_3$ | $\text{NaFeF}_3$ | $\text{NaMnF}_3$ |
|----------------------|------------------|------------------|------------------|
| $a / \text{\AA}$     | 5.6075 (2)       | 5.66121(2)       | 5.7471(2)        |
| $b / \text{\AA}$     | 7.7919(3)        | 7.87985(3)       | 8.0028(2)        |
| $c / \text{\AA}$     | 5.4253(2)        | 5.48324(2)       | 5.5547(1)        |
| Na $x$               | 0.0481(9)        | 0.0462(7)        | 0.0514(3)        |
| Na $y$               | 0.25             | 0.25             | 0.25             |
| Na $z$               | -0.0117(1)       | -0.0071(1)       | -0.0109(3)       |
| M $x$                | 0.5              | 0.5              | 0.5              |
| M $y$                | 0.5              | 0.5              | 0.5              |
| M $z$                | 0                | 0                | 0                |
| F1 $x$               | 0.464(1)         | 0.455(1)         | 0.449(3)         |
| F1 $y$               | 0.25             | 0.25             | 0.25             |
| F1 $z$               | 0.101(2)         | 0.103(1)         | 0.113(3)         |
| F2 $x$               | 0.1931(1)        | 0.1928(7)        | 0.1953 (2)       |
| F2 $y$               | 0.5543(8)        | 0.559(6)         | 0.5609(2)        |
| F3 $z$               | 0.1975(9)        | 0.1892(7)        | 0.1908(2)        |

**Table S2** - Pair potential (Buckingham functional) and shell model parameters.

| interaction | $A$ (eV)    | $\rho$ (Å) | $C$ (eV Å <sup>6</sup> ) | $k$ (eV Å <sup>-2</sup> ) | $\Upsilon$ (e) |
|-------------|-------------|------------|--------------------------|---------------------------|----------------|
| Na – F      | 2810.326262 | 0.246520   | 0                        | -                         | 0              |
| Fe – F      | 5485.758281 | 0.226408   | 0                        | 19.26                     | 2.997          |
| Co – F      | 8714.28     | 0.2113     | 0                        | 19.26                     | 2.997          |
| Mn – F      | 3177.7991   | 0.247763   | 0                        | 19.26                     | 2.997          |
| F – F       | 1153        | 0.1365     | 0                        | 63.57                     | -2.321         |

**Table S3** – Comparison between calculated and experimental structural parameters.

| Composition        | parameter        | Experimental | Calculated | Difference |
|--------------------|------------------|--------------|------------|------------|
| NaCoF <sub>3</sub> | $a / \text{\AA}$ | 5.6075       | 5.5883     | -0.0192    |
|                    | $b / \text{\AA}$ | 7.7919       | 7.8063     | 0.0144     |
|                    | $c / \text{\AA}$ | 5.4253       | 5.4982     | 0.0729     |
| NaFeF <sub>3</sub> | $a / \text{\AA}$ | 5.6612       | 5.6587     | -0.0025    |
|                    | $b / \text{\AA}$ | 7.8798       | 7.8689     | -0.0109    |
|                    | $c / \text{\AA}$ | 5.4832       | 5.5424     | 0.0592     |
| NaMnF <sub>3</sub> | $a / \text{\AA}$ | 5.7471       | 5.7581     | 0.0110     |
|                    | $b / \text{\AA}$ | 8.0028       | 7.9703     | -0.0325    |
|                    | $c / \text{\AA}$ | 5.5547       | 5.6100     | 0.0553     |
